# Supplementary material for: Unveiling Cryptosporidium parvum sporozoite-derived extracellular vesicles: profiling, origin, and protein composition
Source: PubMed Central journal article supplement (PMC11039866; doi:10.3389/fcimb.2024.1367359), 2024-04-10
Supplement: DataSheet_1.pdf [file DataSheet_1.pdf]

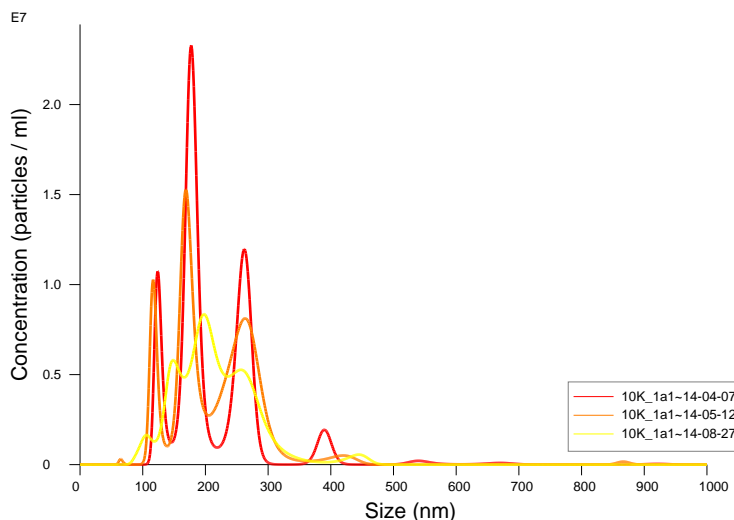

FTLA Concentration / Size graph for Experiment:  
10K\_1a10 2024-02-27 14-03-58

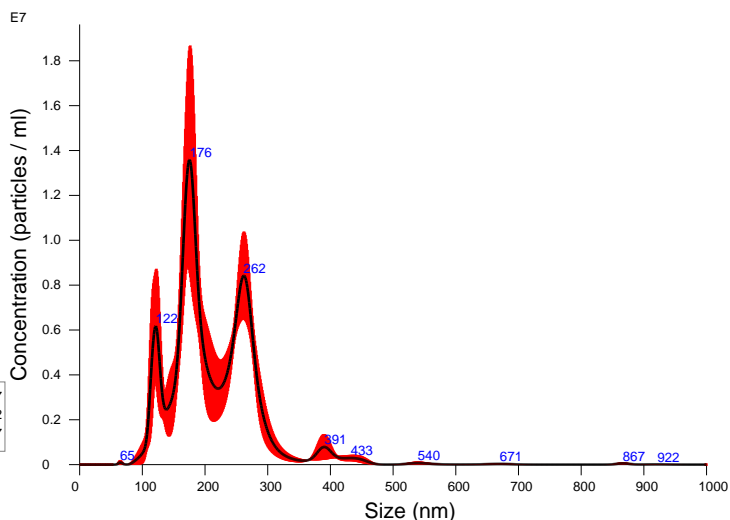

Averaged FTLA Concentration / Size for Experiment:  
10K\_1a10 2024-02-27 14-03-58  
Error bars indicate + / -1 standard error of the mean

### Included Files

10K\_1a10 2024-02-27 14-04-07  
10K\_1a10 2024-02-27 14-05-12  
10K\_1a10 2024-02-27 14-08-27

### Details

NTA Version: NTA 3.4 Build 3.4.4  
Script Used: SOP Standard Measurement 02-03-42PM 27~  
Time Captured: 14:03:58 27/02/2024  
Operator:  
Pre-treatment:  
Sample Name:  
Diluent:  
Remarks:

### Capture Settings

Camera Type: sCMOS  
Laser Type: Blue488  
Camera Level: 14  
Slider Shutter: 1259  
Slider Gain: 245  
FPS: 25.0  
Number of Frames: 1498  
Temperature: 22.8 - 23.1 °C  
Viscosity: (Water) 0.929 - 0.936 cP  
Dilution factor: 1 x 10e1  
Syringe Pump Speed: 30

### Analysis Settings

Detect Threshold: 5  
Blur Size: Auto  
Max Jump Distance: Auto: 11.0 - 11.8 pix

### Results

Stats: Merged Data

Mean: 214.0 nm  
Mode: 175.2 nm  
SD: 74.6 nm  
D10: 130.8 nm  
D50: 195.8 nm  
D90: 283.8 nm

Stats: Mean +/- Standard Error

Mean: 214.1 +/- 1.0 nm  
Mode: 181.3 +/- 8.6 nm  
SD: 73.9 +/- 4.5 nm  
D10: 131.2 +/- 5.8 nm  
D50: 197.9 +/- 6.7 nm  
D90: 284.0 +/- 4.7 nm  
Concentration (Upgrade): 1.16e+09 +/- 6.14e+07 particles/ml  
20.2 +/- 1.1 particles/frame  
23.5 +/- 1.3 centres/frame

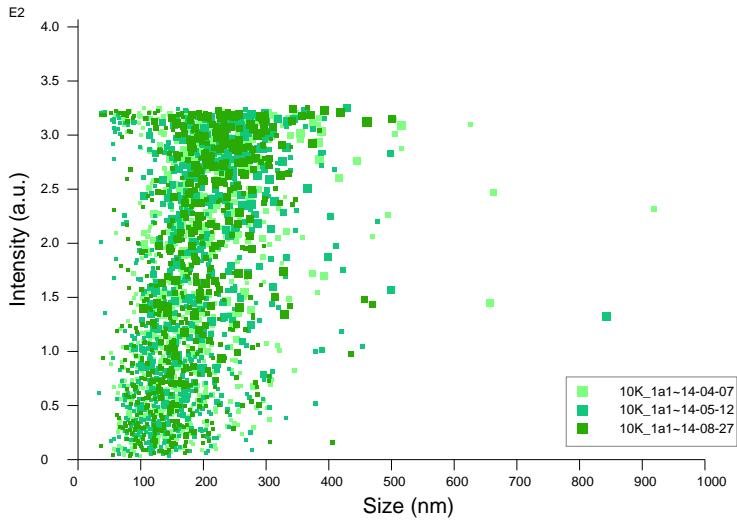

Intensity / Size graph for Experiment:  
10K\_1a10 2024-02-27 14-03-58

**Script Used: (Full Text):**

SOP Standard Measurement 02-03-42PM 27Feb2024.txt
